# Supplementary material for: Long-Term Administration of Triterpenoids From Ganoderma lucidum Mitigates Age-Associated Brain Physiological Decline via Regulating Sphingolipid Metabolism and Enhancing Autophagy in Mice
Source: PubMed Central journal article supplement (PMC8134542; doi:10.3389/fnagi.2021.628860), 2021-05-06
Supplement: Table_1.pdf [file Table_1.pdf]

## Supplementary Tables

**Table S1 The main active substance of triterpenoids of *G. lucidum***

| <b>Compound</b>    | <b>CAS Number</b> | <b>Molecular formula</b>                       | <b>Molecular weight</b> | <b>Extract content (triterpenoids per g of feed) (mg/g)</b> |
|--------------------|-------------------|------------------------------------------------|-------------------------|-------------------------------------------------------------|
| Ganoderenic acid C | 100665-42-7       | C <sub>30</sub> H <sub>44</sub> O <sub>7</sub> | 516.666                 | 0.00017                                                     |
| Ganoderic acid C2  | 103773-62-2       | C <sub>30</sub> H <sub>46</sub> O <sub>7</sub> | 518.682                 | 0.00025                                                     |
| Ganoderic acid G   | 98665-22-6        | C <sub>30</sub> H <sub>44</sub> O <sub>8</sub> | 532.666                 | 0.00061                                                     |
| Ganoderenic acid B | 100665-41-6       | C <sub>30</sub> H <sub>42</sub> O <sub>7</sub> | 514.65                  | 0.00021                                                     |
| Ganoderic acid B   | 81907-61-1        | C <sub>30</sub> H <sub>44</sub> O <sub>7</sub> | 516.666                 | 0.00045                                                     |
| Ganoderic acid A   | 81907-62-2        | C <sub>30</sub> H <sub>42</sub> O <sub>7</sub> | 514.65                  | 0.00156                                                     |
| Ganoderic acid H   | 98665-19-1        | C <sub>31</sub> H <sub>42</sub> O <sub>9</sub> | 558.66                  | 0.00098                                                     |
| Ganoderenic acid D | 100665-43-8       | C <sub>30</sub> H <sub>40</sub> O <sub>7</sub> | 512.634                 | 0.00036                                                     |
| Ganoderic acid D   | 108340-60-9       | C <sub>30</sub> H <sub>42</sub> O <sub>7</sub> | 514.65                  | 0.00102                                                     |

**Table S2 Pharmacokinetic parameters of triterpenes of *G. lucidum***

| Object of study                      | Triterpenoids                                         | Dosage of administration                     | Administration route       | Absorption parameters |                                     |                                        | Distribution parameter             | Elimination parameter |                   |                           |
|--------------------------------------|-------------------------------------------------------|----------------------------------------------|----------------------------|-----------------------|-------------------------------------|----------------------------------------|------------------------------------|-----------------------|-------------------|---------------------------|
|                                      |                                                       |                                              |                            | T <sub>max</sub>      | C <sub>max</sub>                    | AUC                                    | V <sub>d</sub> /L kg <sup>-1</sup> | t <sub>1/2α</sub>     | t <sub>1/2β</sub> | CL                        |
| SD rat (Cao et al., 2017)            | Ganoderic acid A                                      | 20 mg kg <sup>-1</sup>                       | ig                         | (0.15±0.03)h          | (0.91±0.57) μmol·L <sup>-1</sup>    | (1.35±0.46) μmol·h·L <sup>-1</sup>     | 106.24±26.42                       |                       | (2.46±0.75)h      | 32.38±13.45*              |
|                                      |                                                       | 20 mg kg <sup>-1</sup>                       | iv                         |                       |                                     | (14.34±4.54) μmol·h·L <sup>-1</sup>    | 10.21±3.47                         |                       | (2.40±0.35)h      | 2.91±0.81*                |
|                                      |                                                       | 20 mg kg <sup>-1</sup> (brain microdialysis) | iv                         | (0.25±0) h            | (0.61±0.18) μmol·L <sup>-1</sup>    | (0.45±0.09)μmol·h·L <sup>-1</sup>      | 190.61±146.36                      |                       | (1.40±0.93)h      | 89.21±16.21*              |
| SD rat (Cheng et al., 2013)          | Ganoderic acid D                                      | 15 mg kg <sup>-1</sup>                       | iv                         |                       | (3582.93±888.57) μg·L <sup>-1</sup> | ( 2320.18±221.44) μg·h·L <sup>-1</sup> | 4.42±0.47                          |                       | (0.92±0.02)h      | 72.36±6.57 <sup>#</sup>   |
|                                      |                                                       | 15 mg kg <sup>-1</sup>                       | ig (Conventional solution) |                       | (107.18±4.84)μg·L <sup>-1</sup>     | (550.64±23.09) μg·h·L <sup>-1</sup>    | 18.51±0.72                         |                       | (2.05±0.08)h      | 303.11±12.78 <sup>#</sup> |
|                                      |                                                       | 15 mg kg <sup>-1</sup>                       | ig (Nano preparation)      |                       | (1555.59±237.56)μg·L <sup>-1</sup>  | (1629.29±186.23) μg·h·L <sup>-1</sup>  | 6.53±0.45                          |                       | (1.87±0.12)h      | 103.25±10.12 <sup>#</sup> |
|                                      | Ganoderic acid B (the metabolite of Ganoderic acid D) | 15 mg kg <sup>-1</sup> (Ganoderic acid D)    | iv                         |                       | (998.76±108.72)μg·L <sup>-1</sup>   | (2765.89±483.61) μg·h·L <sup>-1</sup>  | 3.79±0.78                          |                       | (1.62±0.46)h      | 61.98±13.10 <sup>#</sup>  |
|                                      |                                                       | 15 mg kg <sup>-1</sup> (Ganoderic acid D)    | ig (Conventional solution) |                       | (271.06±18.02)μg·L <sup>-1</sup>    | (1643.90±92.28) μg·h·L <sup>-1</sup>   | 6.38±0.41                          |                       | (4.12±0.14)h      | 101.59±5.69 <sup>#</sup>  |
|                                      |                                                       | 15 mg kg <sup>-1</sup> (Ganoderic acid D)    | ig (Nano preparation)      |                       | (883.95±35.74)μg·L <sup>-1</sup>    | (1900.99±39.53) μg·h·L <sup>-1</sup>   | 6.68±0.26                          |                       | (3.10±0.13)h      | 87.80±1.81 <sup>#</sup>   |
| SD rat (Guo et al., 2013)            | Ganoderic acid C2                                     | 20 mg kg <sup>-1</sup>                       | per os                     | 25.19 min             | 145.42 μg·L <sup>-1</sup>           | 56600.12 μg·min·L <sup>-1</sup>        |                                    | 3.912                 | 213.5607min       |                           |
| SD rat (Wang et al., 2007)           | Ganoderic acid C2                                     | 55.3 mg kg <sup>-1</sup>                     | ig                         | 16.79 min             | 5.23 mg L <sup>-1</sup>             | 1125.29 mg min L <sup>-1</sup>         | 4.85                               | 11.61                 | 376.08 min        | 47.9 <sup>#</sup>         |
|                                      | Ganoderic acid B                                      | 258.0 mg kg <sup>-1</sup>                    | ig                         | 6.26 min              | 13.15 mg L <sup>-1</sup>            | 5771.93 mg min L <sup>-1</sup>         | 18.03                              | 37.63                 | 852.59 min        | 44.7 <sup>#</sup>         |
|                                      | Ganoderic acid K                                      | 75.8 mg kg <sup>-1</sup>                     | ig                         | 32.10 min             | 2.86 mg L <sup>-1</sup>             | 923.59 mg min L <sup>-1</sup>          | 15.99                              | 32.26                 | 697.48 min        | 82.1 <sup>#</sup>         |
|                                      | Ganoderic acid H                                      | 155.0 mg kg <sup>-1</sup>                    | ig                         | 24.88 min             | 4.92 mg L <sup>-1</sup>             | 986.00 mg min L <sup>-1</sup>          | 14.77                              | 17.13                 | 293.75 min        | 157.2 <sup>#</sup>        |
| Human (Teekachunhatean et al., 2012) | Ganoderic acid A                                      | (4253.4±122.22) μg                           | per os (abrosia)           | (0.54±0.18)h          | (10.99±4.02) μg·L <sup>-1</sup>     | (10.53±4.32) μmin·L <sup>-1</sup>      |                                    |                       | (0.62±0.17)h      |                           |
|                                      |                                                       | (4253.4±122.22) μg                           | per os(no abrosia)         | (1.67±0.88)h          | (3.84±1.56) μg·L <sup>-1</sup>      | (11.02±5.54) μmin·L <sup>-1</sup>      |                                    |                       | (1.34±0.65)h      |                           |
|                                      | Ganoderic acid F                                      | (672.45±24.06) μg                            | per os (abrosia)           | (0.52±0.13)h          | (2.57±0.91) μg·L <sup>-1</sup>      | (2.42±0.93) μmin·L <sup>-1</sup>       |                                    |                       | (0.48±0.22)h      |                           |
|                                      |                                                       | (672.45±24.06) μg                            | per os(no abrosia)         | ND                    | ND                                  | ND                                     |                                    |                       | ND                |                           |

Note: T<sub>max</sub>, time to peak; C<sub>max</sub>, Peak blood concentration; V<sub>d</sub>, apparent volume of distribution; t<sub>1/2α</sub>, Distribution half-life; t<sub>1/2β</sub>, Elimination half-time; ig, intragastric administration; iv, intravenous immunoglobulin; per os, oral administration; #, mL min<sup>-1</sup> kg<sup>-1</sup>; \*, L h<sup>-1</sup> kg<sup>-1</sup>

**Table S3 *G. lucidum* and its effects (Phu et al., 2020)**

| Effects                    | Bioactive Components                                                                       | Potential Mechanisms                                                                                                        | Models                                                                                                          | References            |
|----------------------------|--------------------------------------------------------------------------------------------|-----------------------------------------------------------------------------------------------------------------------------|-----------------------------------------------------------------------------------------------------------------|-----------------------|
| Anti-aging                 | Total water extract of <i>G. lucidum</i>                                                   | Improves the resistance to oxidative stress via the mTOR/S6K signaling                                                      | <i>Caenorhabditis elegans</i>                                                                                   | (Cuong et al., 2019)  |
|                            | <i>G. lucidum</i> ethanol extract                                                          | Increases the expression of Nrf2/ HO-1                                                                                      | C2C12 mouse myoblast cell line                                                                                  | (Lee et al., 2016)    |
|                            | Ganodermanontriol                                                                          | Increases the expression of Nrf2/ HO-1 via PI3K/Akt                                                                         | Hepa1c1c7 cells                                                                                                 | (Ha et al., 2013)     |
|                            | Ganodermanondiol                                                                           | Increases the expression of Nrf2/ HO-1 via AMPK                                                                             | HepG2 cells                                                                                                     | (Li et al., 2013)     |
| Cognitive impairments      | <i>G. lucidum</i> polysaccharides (RF3)                                                    | Activates the expression of DAF-16 via TIR-1 receptor and MAPK                                                              | <i>Caenorhabditis elegans</i>                                                                                   | (Chuang et al., 2009) |
|                            | <i>G. lucidum</i> aqueous extract                                                          | Inhibits the apoptotic-associated signaling pathways JNK-c-Jun, p38MAP kinase signaling                                     | Cortical neurons                                                                                                | (Lai et al., 2008)    |
|                            | <i>G. lucidum</i> aqueous extract                                                          | Up-regulates MAP kinase and cAMP-response element binding protein (CREB) signaling pathways                                 | rat PC12 cells                                                                                                  | (Cheung et al., 2000) |
|                            | <i>G. lucidum</i> ethanol extract                                                          | Regulate DNA methylation in Rodents                                                                                         | D-galactose induced Sprague-Dawley rats; APP/PS1 mice; SAMP8 mice                                               | (Lai et al., 2019)    |
| Hypoglycemic effects       | <i>G. lucidum</i> polysaccharides (containing 89% total carbohydrate and 11% uronic acid.) | Decreases the expression of PEPCK                                                                                           | Obese/diabetic (+db/+db) mice                                                                                   | (Liang et al., 2018)  |
|                            | <i>G. lucidum</i> polysaccharides                                                          | Decreases the mRNA expression of hepatic glycogen phosphorylase, glucose-6-phosphatase, fructose-1,6-bisphosphatase         | Type 2 diabetic mice                                                                                            | (Xiao et al., 2012)   |
|                            | <i>G. lucidum</i> polysaccharides (F31)                                                    | Decreases the mRNA levels of hepatic glucose regulatory enzymes via AMPK activation                                         | Type 2 diabetic mice                                                                                            | (Xiao et al., 2017)   |
|                            | <i>G. lucidum</i> polysaccharides                                                          | Facilitates Ca <sup>2+</sup> entry into pancreatic $\beta$ cells beta cells                                                 | Normal fasted mice                                                                                              | (Zhang et al., 2004)  |
| Antihyperlipidemic effects | GLPs proteoglycan extract (FYGL)                                                           | Suppress the expression of protein tyrosine phosphatase 1B (PTP1B)                                                          | Type 2 diabetes mellitus(T2DM) rats.                                                                            | (Teng et al., 2012)   |
|                            | GLPs proteoglycan extract (FYGL)                                                           | Inhibits the expression of PTP1B, activate PI3K/Akt increases phosphorylation of AMPK, up-regulate the expression of GLUT 4 | Obese C57BL/6(ob/ob) mice, rat myoblast L6 cells                                                                | (Yang et al., 2018)   |
|                            | <i>G. lucidum</i> spores                                                                   | Up-regulates acyl-CoA oxidase 1 (Acox1) and Insig-1/2 gene expression                                                       | Diabetic rats                                                                                                   | (Wang et al., 2015)   |
|                            | <i>G. lucidum</i> ethanol extract (GL95)                                                   | Reduces the mRNA levels of FAS, ACAT2, SREBP-1C, HMGCR elevates the mRNA levels of CYP7A1, PPAR $\alpha$ , ApoB and Acox1   | HFD-fed Wistar rats                                                                                             | (Guo et al., 2018)    |
| Antitumous effect          | <i>G. lucidum</i> ethanol extract                                                          | Activates leptin-mediated signaling to improve metabolic regulation                                                         | HFD-fed mice                                                                                                    | (Diling et al., 2020) |
|                            | Ganoderic acid A/DM                                                                        | Induced NDRG2 over-expression                                                                                               | In vitro cell culture and in vivo cell-line-derived orthotopic xenograft animal models of anaplastic meningioma | (Das et al., 2020)    |

**Table S4 The IPA analysis showed that the function and diseases, including the Carbohydrate Metabolism, Lipid Metabolism, were influenced (APP/PS1).**

| Category                               | p-value           | Category                                             | p-value           |
|----------------------------------------|-------------------|------------------------------------------------------|-------------------|
| Cancer                                 | 1.49E-29-1.69E-04 | Nervous System Development and Function              | 6.47E-08-1.91E-05 |
| Dermatological Diseases and Conditions | 1.49E-29-1.8E-04  | Hematological Disease                                | 1.44E-07-1.61E-04 |
| Organismal Injury and Abnormalities    | 1.49E-29-1.89E-04 | Auditory Disease                                     | 1.44E-07-1.44E-07 |
| Neurological Disease                   | 3.5E-24-1.89E-04  | Developmental Disorder                               | 3.3E-07-1.76E-04  |
| Gastrointestinal Disease               | 1.86E-23-1.83E-04 | Cellular Movement                                    | 3.81E-07-1.6E-04  |
| Hereditary Disorder                    | 4.26E-21-5.65E-05 | Hematological System Development and Function        | 3.81E-07-1.6E-04  |
| Psychological Disorders                | 4.26E-21-1.73E-04 | Immune Cell Trafficking                              | 3.81E-07-1.6E-04  |
| Skeletal and Muscular Disorders        | 4.26E-21-1.44E-04 | Cell Signaling                                       | 4.61E-07-1E-04    |
| Cardiovascular Disease                 | 1.64E-13-1.73E-04 | Vitamin and Mineral Metabolism                       | 4.61E-07-6.88E-06 |
| Nutritional Disease                    | 8.43E-13-9.04E-09 | Nucleic Acid Metabolism                              | 7.47E-07-1E-04    |
| Endocrine System Disorders             | 1.46E-12-1.69E-04 | Small Molecule Biochemistry                          | 7.47E-07-1.8E-04  |
| Hepatic System Disease                 | 8.77E-12-9.65E-05 | Tumor Morphology                                     | 3.38E-06-1.1E-05  |
| Metabolic Disease                      | 9.01E-11-9.72E-05 | Cell-mediated Immune Response                        | 8.41E-06-2.56E-05 |
| Reproductive System Disease            | 2.97E-10-1.85E-04 | Hair and Skin Development and Function               | 1.5E-05-1.5E-05   |
| Immunological Disease                  | 3.19E-10-1.8E-04  | Renal and Urological System Development and Function | 1.59E-05-1.59E-05 |
| Inflammatory Disease                   | 3.19E-10-1.8E-04  | DNA Replication, Recombination, and Repair           | 2.8E-05-4.8E-05   |
| Respiratory Disease                    | 3.19E-10-1.44E-04 | Embryonic Development                                | 6.85E-05-1.38E-04 |
| Renal and Urological Disease           | 6.43E-10-1.84E-04 | Organismal Development                               | 6.85E-05-1.38E-04 |
| Inflammatory Response                  | 2.17E-09-1.8E-04  | Post-Translational Modification                      | 1E-04-1E-04       |
| Connective Tissue Disorders            | 5.98E-09-1.44E-04 | Carbohydrate Metabolism                              | 1.1E-04-1.23E-04  |
| Infectious Diseases                    | 1.69E-08-1.39E-04 | Lipid Metabolism                                     | 1.1E-04-1.23E-04  |
| Ophthalmic Disease                     | 1.91E-08-1.8E-04  | Hypersensitivity Response                            | 1.6E-04-1.6E-04   |
| Behavior                               | 3.21E-08-1.04E-05 | Cellular Assembly and Organization                   | 1.88E-04-1.88E-04 |
| Molecular Transport                    | 6.37E-08-1E-04    | Cellular Function and Maintenance                    | 1.88E-04-1.88E-04 |
| Cell-To-Cell Signaling and Interaction | 6.47E-08-6.8E-05  |                                                      |                   |

**Table S5 The different expressed mRNAs enriched into the sphingolipid metabolism (APP/PS1).**

| Ingenuity Canonical Pathways                                 | -log(p-value) | Molecules                                                                                                                                                                                                       |
|--------------------------------------------------------------|---------------|-----------------------------------------------------------------------------------------------------------------------------------------------------------------------------------------------------------------|
| 1D-myo-inositol Hexakisphosphate Biosynthesis II (Mammalian) | 1.76          | INPP5J, INPP5D, ITPKB, ITPKA, INPP5A                                                                                                                                                                            |
| 3-phosphoinositide Biosynthesis                              | 0.901         | DUSP10, PTPRM, PIK3R3, PHOSPHO1, CDC25A, IRS1, PTPN22, KIT, VAV1, EPHX2, CD28, DUSP5, DUSP14, PPP1R1A, PPP1R1B, CD86, PIP5K1B, SGPP2, PXYLP1, PTPN7, DUSP16                                                     |
| 3-phosphoinositide Degradation                               | 1.11          | DUSP10, INPP5J, PTPRM, PHOSPHO1, CDC25A, PTPN22, EPHX2, MTM1, INPP5D, DUSP5, DUSP14, PPP1R1A, INPP4B, PPP1R1B, SGPP2, PXYLP1, PTPN7, DUSP16                                                                     |
| Adipogenesis pathway                                         | 1.08          | AGPAT2, KAT2B, FGF1, FZD2, FZD7, SMAD9, KAT6A, LPIN1, SLC2A4, FZD1, CTBP2, SAP30, EBF1, LPL, RPS6KA1, KLF5                                                                                                      |
| Ceramide Biosynthesis                                        | 0.341         | SPTSSB                                                                                                                                                                                                          |
| Ceramide Degradation                                         | 0.341         | ASAH2                                                                                                                                                                                                           |
| Ceramide Signaling                                           | 0.287         | TNFRSF11B, FOS, PIK3R3, SMPD3, CERK, MRAS, MAP3K1, IRS1                                                                                                                                                         |
| Complement System                                            | 1.13          | C1QC, ITGAM, CFB, C3, C1QB, ITGAX                                                                                                                                                                               |
| CREB Signaling in Neurons                                    | 3.63          | GNG11, PRKAR2B, MRAS, GNG10, GNG7, IRS1, PLCE1, GRIN2C, GRM3, GRM4, GNG3, PRKCB, ADCY2, ITPR1, GRM1, GNG13, PRKCH, GRIA4, GRM5, NOTUM, GRIK5, PIK3R3, ADCY5, PLCB4, CAMK4, CAMK2A, ITPR3, GRID2, RPS6KA1, PLCZ1 |
| GDNF Family Ligand-Receptor Interactions                     | 1.64          | FOS, DOK4, PIK3R3, ITPR3, GFRA1, MRAS, MAPK12, RET, GFRA4, DOK6, IRS1, ITPR1                                                                                                                                    |
| GDP-glucose Biosynthesis                                     | 0.3           | HK2                                                                                                                                                                                                             |
| Glucose and Glucose-1-phosphate Degradation                  | 0.265         | HK2                                                                                                                                                                                                             |
| Glutathione-mediated Detoxification                          | 0.218         | GSTT2/GSTT2B, HPGDS                                                                                                                                                                                             |
| Glycoaminoglycan-protein Linkage Region Biosynthesis         | 0.341         | B3GAT1                                                                                                                                                                                                          |
| Granulocyte Adhesion and Diapedesis                          | 1.03          | ITGAM, ITGAL, MMP9, ITGA3, EZR, CLDN19, MMP17, CCL21, CCL27, CX3CL1, SDC1, TNFRSF11B, IL18, HRH3, SELPLG, IL1RL2, CXCL14, MMP23B, MMP24                                                                         |

---

|                                                    |       |                                                                                                                                                                                             |
|----------------------------------------------------|-------|---------------------------------------------------------------------------------------------------------------------------------------------------------------------------------------------|
| NAD Phosphorylation and Dephosphorylation          | 0.236 | PXYLP1                                                                                                                                                                                      |
| Phenylalanine Degradation I (Aerobic)              | 0.532 | PCBD1                                                                                                                                                                                       |
| Phospholipase C Signaling                          | 1.48  | GNG11, ITGA3, RHOD, PLD3, MRAS, GNG10, GNG7, PLCE1, LCP2, SYK, GNG3, PRKCB, ADCY2, ITPR1, GNG13, PRKCH, BLNK, FNBP1, MYL4, ADCY5, PLCB4, CAMK4, PLA2G3, MEF2C, FCGR2A, ITPR3, PPP3R1, CD247 |
| Phospholipases                                     | 1.27  | PNPLA3, PLCB4, PLD3, PLCE1, PLCZ1, PLB1, PLA2G3, NOTUM, LIPG                                                                                                                                |
| Renin-Angiotensin Signaling                        | 2.36  | PIK3R3, ADCY5, PRKAR2B, MRAS, MAPK12, IRS1, AGTR2, SHC3, AGT, FOS, ITPR3, PAK6, PTK2B, MAP3K1, MAPK13, PRKCB, ADCY2, ITPR1, PRKCH                                                           |
| Sphingomyelin Metabolism                           | 0.3   | SMPD3                                                                                                                                                                                       |
| Sphingosine and Sphingosine-1-phosphate Metabolism | 0.772 | ASAH2, SGPP2                                                                                                                                                                                |
| Sphingosine-1-phosphate Signaling                  | 0.861 | PIK3R3, SMPD3, ADCY5, RHOD, PLCB4, ASAH2, IRS1, PLCE1, PDGFB, PTK2B, ADCY2, PLCZ1, NOTUM, FNBP1                                                                                             |

---
